# Supplementary material
Source: PubMed Central journal article supplement (PMC2670943)
Supplement: NIHMS93263-supplement-01.pdf [file NIHMS93263-supplement-01.pdf]

**Supplement to: Pentameric Assembly of Potassium Channel Tetramerization Domain-Containing Protein 5 (KCTD5)** by Irina S. Dementieva, Valentina Tereshko, Zoe A. McCrossan, Elena Solomaha, Daniel Araki, Chen Xu, Nikolaus Grigorieff and Steve A. N. Goldstein

**Supplement Figure legends**

**Supplement Figure 1. The C-terminal KCTD5 module. (a-c)** Conformational diversity of  $\beta 5$ - $\beta 6$  loops crowning the KCTD5 C-terminal module as determined by X-ray crystallography. **(a)** Ribbon representation of individual subunits superimposed on the  $\beta 5$ - $\beta 6$  hairpin: three loops in cyan, blue and yellow are from high-salt structure; the loop shown in red is from low-salt structure. Four other subunits in the pentameric assembly are included in pale colors. **(b-c)**. Selected conformation of  $\beta 5$ - $\beta 6$  loop in high- **(b)** and low- **(c)** salt crystals shown in ball-and-stick presentation with the residues 189-200 (SSYNYGNEDQAE) are labeled. The acidic Glu196, Asp197 ( $\beta 5$ - $\beta 6$  loop) and Glu165-167 ( $\beta 4$ - $\alpha 6$  turn) that are exposed to solvent are boxed. **(d)** The  $C\alpha$ -trace of the C-terminal KCTD5 domain, residues 155-210 (in stereo). **(e)** The SigmaA-weighted  $2F_{obs}-F_{calc}$  electron density map contoured at  $1\sigma$  level around  $\beta 5$ - $\beta 6$  loop and  $\beta 4$ - $\alpha 6$  turn residues in high-salt KCTD5 crystal structure.

**Supplement Figure 2. The H-bond interactions in the N-terminal (a) and C-terminal (b) KCTD5 pentameric modules.** The distances (averaged over five independent interfaces) from the high-salt KCTD5 and truncated N-terminal KCTD5 structures are in **(a)** on left in right, respectively; the distances from high-salt KCTD5 are in **(b)**. **(c)** The comparative alignment of the residues found at the interface between the adjacent subunits in the KCTD5 and Kv T1-domain assemblies. The T1-domain H-bonded residues are indicated in black; those that are not involved in the H-bond formation are shown in gray. Four key aliphatic substitutions in KCTD5 are shown in red; other KCTD5 residues are colored to match the BTB coloring scheme (shown on left) with the secondary structure elements indicated in the middle. The H-bonded moieties judged crucial for circular arrangement in Kv channel T1 crystal structures and conserved in KCTD5 are highlighted in yellow in **(a)**. KCTD5 and Kv4.2 have one extra common pair (boxed in yellow) due to the presence of Asp residue (analogous to Asp95 in KCTD5) in the  $\beta 3$ - $\alpha 3$  loop. Kv T1-domain X-ray structures used: Kv1.1 (PDBid 1T1D), Kv3.1 (PDBid 3KVT), Kv4.2 (PDBid 1NN7).

# Figure S1

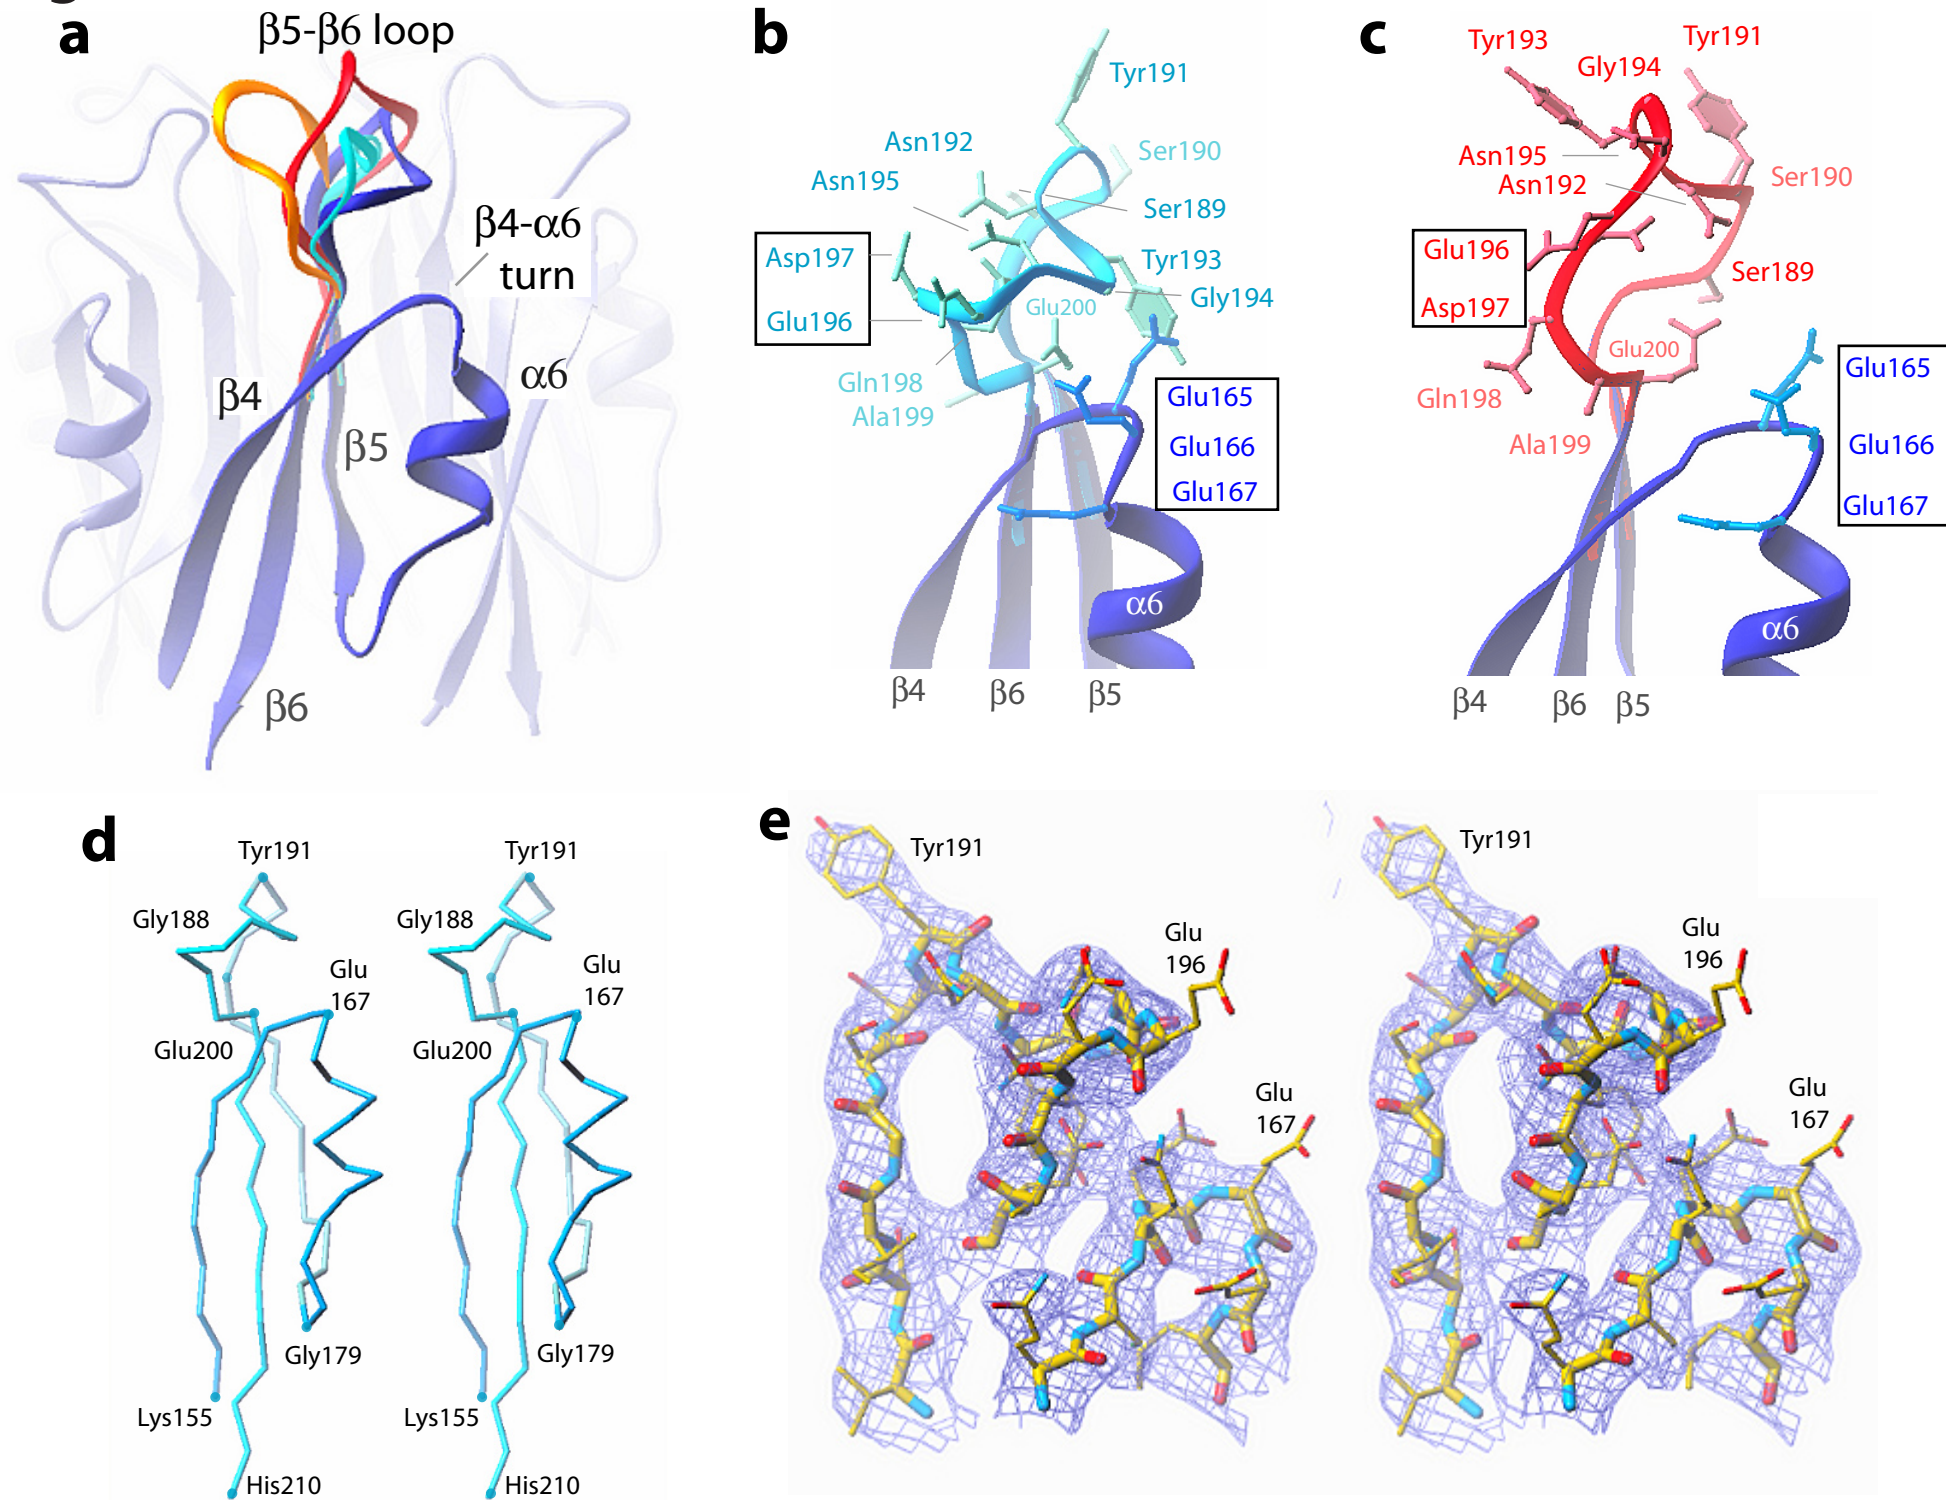

# Figure S2

**a**

| H-bond Distance, A |     | subunit 1 residue atom | subunit2 atom residue |
|--------------------|-----|------------------------|-----------------------|
| 2.8                | 3.2 | Glu124 - OE1           | NZ - Lys110           |
| 3.3                | 3.2 | Asp116 - O             | N - Lys115            |
| 3.2                | 3.0 | Ala118 - N             | OD1 \<br>ND2 / Asn114 |
| 2.9                | 2.5 | Tyr 98 - OH            |                       |
| 2.9                | 3.5 |                        |                       |
| 2.6                | 3.5 | Asp95 - D2             | ND2 - Asn104          |
| 3.0                | 2.8 | Asp93<br>OD1           | NE Arg107             |
| 3.1                | 3.1 |                        | NH1                   |
| 2.8                | 2.8 |                        |                       |
| 3.5                | 3.3 | OD2                    | OG1 - Thr57           |
| 2.8                | 2.8 |                        | OG1 - Thr58           |
| 2.7                | 2.6 |                        | OG1 - Thr61           |
| 3.2                | 3.1 | Gly51 O                | N - Leu56             |
| 3.4                | 3.1 | Asp83 OD1              | NE1 - Trp45           |

**c**

L3

L2

L1

BTB segment

**b**

| H-bond Distance, A | subunit 1 residue atom | subunit2 atom residue |
|--------------------|------------------------|-----------------------|
| 2.9                | Gln183<br>OE1<br>NE2   | N - Leu184            |
| 2.9                |                        | O - Leu184            |
| 3.2                | Tyr158 OH              | N - Phe181            |

| subunit 1          |                   |                    |                    | subunit 2         |            |                    |                    |                   |                    |
|--------------------|-------------------|--------------------|--------------------|-------------------|------------|--------------------|--------------------|-------------------|--------------------|
| Kv1.1              | Kv3.1             | Kv4.2              | KCTD5              | Interface         | KCTD5      | Kv4.2              | Kv3.1              | Kv1.1             |                    |
| Glu <sup>144</sup> | Glu <sup>87</sup> | Glu <sup>117</sup> | Glu <sup>124</sup> | α4-helix          | α3-α4      | Lys <sup>110</sup> | Lys <sup>103</sup> | Lys <sup>73</sup> | Arg <sup>130</sup> |
| Asn <sup>136</sup> | Asp <sup>79</sup> | His <sup>109</sup> | Asp <sup>116</sup> | α3-α4             | α3-α4      | Lys <sup>115</sup> | Arg <sup>108</sup> | Thr <sup>78</sup> | Val <sup>135</sup> |
| Asp <sup>140</sup> | Cys <sup>81</sup> | Cys <sup>111</sup> | Ala <sup>118</sup> | α3-α4 loop        | α3-α4 loop | Val <sup>112</sup> | His <sup>105</sup> | His <sup>75</sup> | Arg <sup>132</sup> |
| Pro <sup>138</sup> |                   |                    |                    | Val <sup>61</sup> |            |                    |                    |                   |                    |
| Arg <sup>115</sup> | Pro <sup>59</sup> | Pro <sup>89</sup>  | Asp <sup>95</sup>  | β3-α3 turn        | α3-helix   | Asn <sup>104</sup> | Asn <sup>97</sup>  | Asn <sup>67</sup> | Tyr <sup>123</sup> |
| Asn <sup>114</sup> | His <sup>58</sup> | Asp <sup>88</sup>  |                    |                   |            |                    |                    |                   |                    |
| Asp <sup>112</sup> | Asp <sup>56</sup> | Asp <sup>86</sup>  | Asp <sup>93</sup>  | β3-α3 turn        | α3-helix   | Arg <sup>107</sup> | Arg <sup>100</sup> | Arg <sup>70</sup> | Gln <sup>126</sup> |
|                    |                   |                    |                    |                   |            |                    |                    |                   |                    |
| Ser <sup>73</sup>  | Gly <sup>17</sup> | Ser <sup>48</sup>  | Gly <sup>51</sup>  | β1-β2 turn        | β2-strand  | Leu <sup>56</sup>  | Gln <sup>53</sup>  | Glu <sup>22</sup> | Glu <sup>78</sup>  |
| Asn <sup>71</sup>  | Asn <sup>15</sup> | Asn <sup>46</sup>  | Asn <sup>49</sup>  |                   |            |                    |                    |                   |                    |
|                    |                   |                    | Asp <sup>83</sup>  | α1-α2 loop        | β1-strand  | Trp <sup>45</sup>  |                    |                   |                    |
